# Vestibular rehabilitation practice in neurorehabilitation: an Italian survey protocol

Nicola Ferri<sup>1,2</sup>, Jacopo Piermaria<sup>3</sup>, Leonardo Manzari<sup>4</sup>, Andrea Turolla<sup>1,2</sup>, Giovanni Morone<sup>5</sup>, Marco Tramontano<sup>1,2</sup>

<sup>1</sup>Department of Biomedical and Neuromotor Sciences (DIBINEM), Alma Mater Studiorum University of Bologna, Bologna, Italy

<sup>2</sup>Division of Occupational Medicine, IRCCS University Hospital of Bologna S Orsola-Malpighi Polyclinic, Bologna, Italy

<sup>3</sup>Santa Lucia Foundation IRCCS, Via Ardeatina 306, 00179 Rome, Italy

<sup>4</sup>MSA ENT Academy Centre, Cassino, Italy

<sup>5</sup>Department of Life, Health and Environmental Sciences, University of L'Aquila, 67100 L'Aquila, Italy

## Abstract

### Introduction

Neurological disorders are a prevalent cause of disability and death, which has a considerable impact on the world's economic and healthcare systems, not least because of rehabilitation needs. Neurorehabilitation is effective and recommended for the best recovery of motor and cognitive functions and quality of life. This study evaluates clinicians' perceptions of vestibular rehabilitation's actual or potential role in neurorehabilitation.

### Methods

This is the protocol for a cross-sectional study that will be conducted as an online survey approved by the University of Bologna Bioethics Committee. The survey lasts approximately 10 minutes and consists of 4 main sections (socio-demographic, professional, clinical, and future recommendation data), with a total of 27 closed questions and 2 open questions. 5 experts constructed the questionnaire, and then 6 respondents piloted it; these latter were representative of the subjects to whom it will be administered. We will report the Survey following the Checklist for Reporting Of Survey Studies (CROSS).

### Expected results

This questionnaire will map the knowledge and use of vestibular rehabilitation in neurorehabilitation by healthcare professionals in Italy. It will also be useful to assess gaps, challenges, and research perspectives on this prevalent topic.

### Keywords

Survey, Nervous System Diseases, Rehabilitation, video Head Impulse Test, Vestibular System, Exercise Therapy

## Background

Neurological disorders are the first cause of disability and the second cause of death, with a worldwide estimate of one in three people being diagnosed at a certain point in their lifetime.<sup>1</sup> Thus, it is a significant reason for rehabilitation needs, which does not end in the short term but could last for a long time in a patient's life.<sup>2</sup> This impacts the burden of neurological disorders on healthcare systems, representing an annual cost of 266 billion euros in Europe.<sup>3</sup>

Neurorehabilitation is a complex and multidisciplinary process effective in caring for people with nervous system injury, with the aim of improving the recovery of patients' functionality and autonomy.<sup>4</sup> There are several recommendations supporting neurorehabilitation to improve neuromotor and cognitive abilities in different neurological disorders like stroke,<sup>5</sup> Parkinson's disease,<sup>6</sup> multiple sclerosis,<sup>7</sup> concussion and mild traumatic brain injury.<sup>8</sup>

Vestibular rehabilitation is a treatment approach based mainly on exercises that target the postural and balance systems to recover from dysfunctions or injuries of the vestibular system.<sup>9</sup> Recently, there has been a growing body of evidence supporting the effectiveness of vestibular rehabilitation in other neurological disorders as well.<sup>10–13</sup>

A recent survey attempted to quantify vestibular knowledge among European therapists; however, Italy was not sufficiently represented, having included only one respondent.<sup>14</sup> Thus, this study aims to map the knowledge, modalities, and perspectives of vestibular rehabilitation in persons with neurological disorders among Italian healthcare professionals, both at clinical and research levels.

## Methods

This online survey is a cross-sectional study in the Italian language aimed at healthcare professionals involved in vestibular rehabilitation. The Bioethics Committee at the University of Bologna has approved the study. The survey consists of four sections: sociodemographic information, professional background, clinical practice data, and future perspectives. A total of 27 closed and two open-ended questions were included. Each section and each item were developed by a team of 5 experts, with an iterative feedback process to improve clarity, validity, fluency, and response time. Then, the draft was piloted by six independent respondents who are representative of our target population, and the final survey was obtained by implementing the feedback received. Our survey takes about 10 minutes to complete.

The demographic characteristics of respondents who piloted the surveys are reported in Table 1.

For our study, we defined vestibular rehabilitation as the set of exercises and strategies primarily targeting the vestibular system.

We followed methodological recommendations when conducting this research.<sup>15,16</sup> The survey will be reported in accordance with the Checklist for Reporting Of Survey Studies (CROSS).<sup>17</sup>

**Table 1. Piloting respondents (n= 6).**

|                                | Piloting respondents |
|--------------------------------|----------------------|
| Sex (Female, %)                | 3 (50%)              |
| Age (mean, SD)                 | 41.8 (10.7)          |
| Position* (n, %)               |                      |
| Clinician                      | 5                    |
| Researcher                     | 2                    |
| Academic education (years, SD) | 6.2 (3.1)            |

\*Total positions are greater than 6, because respondents may be clinicians and researchers.

The software will filter the respondents according to their IP address to avoid multiple answers from the same user. No personal identifying information will be collected; informed consent will be obtained online before the start of the survey.

The survey will be disseminated online via social channels (i.e., Facebook, X, LinkedIn) and through emails from national professional associations. We consider a minimum sample of 120 respondents to be appropriate. The survey will be open approximately from 22/04/2024 to 31/05/2024, and we'll follow the Dillman approach<sup>18</sup> to enhance survey compliance; in particular, we'll send each week a reminder for three weeks. We will also repeatedly publish outlets via social media during the survey's opening period. Respondents will not be offered any incentive or compensation.

### Statistical analysis

Descriptive analyses will be presented to assess the respondents' demographic characteristics and survey results. Tables and graphs will be reported to better understand the findings. Closed questions will be analyzed by frequencies for categorical variables and mean  $\pm$  standard deviation for continuous variables. Open-ended questions will be coded by an independent researcher and reported in a thematic analysis. We will exclude completely blank surveys.

The survey and the output will be generated using Qualtrics software (Provo, UT, USA), and statistical analyses will be performed with STATA 18 software (StataCorp. 2023, College Station, TX, USA).

### Funding source

This research received no specific grant from funding agencies in the public, commercial, or not-for-profit sectors.

### Conflict of interest

The authors declare no conflict of interest with any financial organization regarding the material discussed in the manuscript.

### References

1. Feigin VL, Vos T, Nichols E, et al. The global burden of neurological disorders: translating evidence into policy. *Lancet Neurol.* 2020;19(3):255-265. doi:10.1016/S1474-4422(19)30411-9
2. Cieza A, Causey K, Kamenov K, Hanson SW, Chatterji S, Vos T. Global estimates of the need for rehabilitation based on the Global Burden of Disease study 2019: a systematic analysis for the Global Burden of Disease Study 2019. *Lancet Lond Engl.* 2021;396(10267):2006-2017. doi:10.1016/S0140-6736(20)32340-0
3. Olesen J. The cost of neurological disorders in Europe. *J Neurol Sci.* 2015;357:e500-e501. doi:10.1016/j.jns.2015.09.303
4. Krucoff MO, Rahimpour S, Slutzky MW, Edgerton VR, Turner DA. Enhancing Nervous System Recovery through Neurobiologics, Neural Interface Training, and Neurorehabilitation. *Front Neurosci.* 2016;10:584. doi:10.3389/fnins.2016.00584
5. Kwakkel G, Stinear C, Essers B, et al. Motor rehabilitation after stroke: European Stroke Organisation (ESO) consensus-based definition and guiding framework. *Eur Stroke J.* 2023;8(4):880-894. doi:10.1177/23969873231191304
6. Rafferty MR, Nettnin E, Goldman JG, MacDonald J. Frameworks for Parkinson's Disease Rehabilitation Addressing When, What, and How. *Curr Neurol Neurosci Rep.* 2021;21(3):12. doi:10.1007/s11910-021-01096-0

7. Amatya B, Khan F, Galea M. Rehabilitation for people with multiple sclerosis: an overview of Cochrane Reviews. *Cochrane Database Syst Rev*. 2019;1(1):CD012732. doi:10.1002/14651858.CD012732.pub2
8. De Luigi AJ, Bell KR, Bramhall JP, et al. Consensus statement: An evidence-based review of exercise, rehabilitation, rest, and return to activity protocols for the treatment of concussion and mild traumatic brain injury. *PM R*. 2023;15(12):1605-1642. doi:10.1002/pmrj.13070
9. Sulway S, Whitney SL. Advances in Vestibular Rehabilitation. *Adv Otorhinolaryngol*. 2019;82:164-169. doi:10.1159/000490285
10. Tramontano M, Russo V, Spitoni GF, et al. Efficacy of Vestibular Rehabilitation in Patients With Neurologic Disorders: A Systematic Review. *Arch Phys Med Rehabil*. 2021;102(7):1379-1389. doi:10.1016/j.apmr.2020.11.017
11. Mitsutake T, Imura T, Tanaka R. The Effects of Vestibular Rehabilitation on Gait Performance in Patients with Stroke: A Systematic Review of Randomized Controlled Trials. *J Stroke Cerebrovasc Dis Off J Natl Stroke Assoc*. 2020;29(11):105214. doi:10.1016/j.jstrokecerebrovasdis.2020.105214
12. Babula G, Warunek E, Cure K, Nikolski G, Fritz H, Barker S. Vestibular Rehabilitation as an Early Intervention in Athletes Who are Post-concussion: A Systematic Review. *Int J Sports Phys Ther*. 2023;V18(3):577-586. doi:10.26603/001c.75369
13. Meng L, Liang Q, Yuan J, et al. Vestibular rehabilitation therapy on balance and gait in patients after stroke: a systematic review and meta-analysis. *BMC Med*. 2023;21(1):322. doi:10.1186/s12916-023-03029-9
14. Meldrum D, Burrows L, Cakrt O, et al. Vestibular rehabilitation in Europe: a survey of clinical and research practice. *J Neurol*. 2020;267(Suppl 1):24-35. doi:10.1007/s00415-020-10228-4
15. Wardropper CB, Dayer AA, Goebel MS, Martin VY. Conducting conservation social science surveys online. *Conserv Biol J Soc Conserv Biol*. 2021;35(5):1650-1658. doi:10.1111/cobi.13747
16. Dillman D, Smyth J, Christian L. *Internet, Phone, Mail, and Mixed-Mode Surveys: The Tailored Design Method*. 4th ed. John Wiley & Sons; 2014.
17. Sharma A, Minh Duc NT, Luu Lam Thang T, et al. A Consensus-Based Checklist for Reporting of Survey Studies (CROSS). *J Gen Intern Med*. 2021;36(10):3179-3187. doi:10.1007/s11606-021-06737-1
18. Dillman D, Smyth J, Christian L. *Internet, Phone, Mail, and Mixed-Mode Surveys: The Tailored Design Method*. 4th Edition. John Wiley & Sons; 2014.
